# Supplementary material for: Consumer-grade EEG devices: are they usable for control tasks?
Source: PeerJ. 2016 Mar 22;4:e1746. doi: 10.7717/peerj.1746 (PMC4806709; doi:10.7717/peerj.1746)
Supplement: Data S1 — Data of attention/meditation and blinking recognition using Neurosky Mindwave and Emotiv EPOC. [file peerj-04-1746-s001.xlsx]

## Sheet: blinking
S1	35.8356	82.7971	8.3039	31.4021	71.2968	22.4244	47.0438	57.2124	93.3095	29.8422	23.1809	78.4083	25.1727	37.718	4.35885	83.8255	58.4417	63.9601	53.8081	83.5915	78.039	40.9979	52.5283	85.1087	37.6551	88.8919	49.7117	64.2225	35.68	18.8293	11.225	13.2229	48.3713	96.5469	10.2787	67.5672	64.1672	74.8973	83.7718	53.4682	48.4854	61.9866	18.3001	61.643	16.6256	27.3097	72.6651	80.3591	62.3489
S2	25.4022	20.925	51.0481	56.0932	76.302	36.0874	59.8324	21.8519	68.3419	28.4648	31.8585	55.7264	93.2752	53.4854	51.0935	30.2352	85.8952	74.503	79.7976	60.8472	73.6933	39.8451	17.6697	82.4072	26.7174	4.86452	59.5165	95.997	90.4172	84.9252	72.511	77.196	91.7604	96.1312	45.3426	68.193	92.356	0.839803	60.3201	15.9589	83.6045	54.4482	79.1738	32.0555	99.1552	59.9184	87.8254	12.1018	4.11613
S3	0.232449	70.9626	16.9061	84.1005	63.4733	6.75782	88.3508	19.4857	41.1827	90.706	82.3301	9.68906	69.9623	50.1879	12.3967	84.9127	78.6423	73.8534	89.7785	85.545	58.1995	18.2061	74.244	94.3505	41.5389	57.3869	17.584	69.9168	45.1595	29.1034	93.8574	29.1853	9.68692	8.68776	62.3472	49.9758	16.4542	9.79633	58.8553	82.6285	43.5632	37.4161	7.89953	45.0486	21.6122	91.2924	20.8425	64.0419	84.1177
S4	41.3188	41.5797	82.3298	66.5795	10.7783	53.5622	62.2187	29.7134	19.2407	18.6895	21.3657	52.2705	85.8554	80.9547	77.8098	35.2787	35.9241	46.6544	85.8032	28.8043	54.4571	18.9874	73.6046	88.8202	33.9317	37.169	53.4598	91.3582	86.2195	57.0993	27.294	76.8165	60.9408	13.9446	57.6244	69.1405	19.9815	2.03872	38.1479	35.3123	75.2582	35.218	32.2579	20.6881	26.4361	95.5436	27.5255	41.692	20.4492
S5	32.4804	81.7115	98.9349	12.2805	17.2246	78.647	71.4997	52.2643	64.0183	77.4007	91.3662	49.8153	23.6373	22.5703	42.5663	83.1399	77.3103	48.5175	19.6967	54.1056	31.6834	26.2746	77.9084	77.424	72.5572	57.6779	64.5897	13.7252	48.5179	77.4696	37.1121	21.1271	52.4245	60.2142	13.4235	30.685	42.4013	89.5096	25.0896	56.6862	87.4741	15.0874	15.7332	72.007	76.9634	7.0761	74.4363	10.6726	84.7866
S6	20.1255	43.1872	25.4577	26.0098	19.6483	82.3846	60.3579	58.323	98.7205	81.535	53.6031	28.5003	77.1623	97.3364	6.18881	95.7572	81.3099	8.71501	94.401	90.75	4.8167	78.6251	99.0825	60.2068	26.2646	54.1537	25.8667	22.4587	91.4633	11.7475	4.76951	81.0848	57.6698	67.9183	6.27502	20.8058	89.3379	31.9009	59.0801	18.7117	36.7085	43.5154	48.2575	29.9518	85.8254	19.3428	42.1734	49.7138	79.6415
S7	54.7238	35.7654	31.3989	62.874	20.7579	68.5228	11.7921	70.9603	76.7324	45.6825	32.3797	10.9795	90.3889	38.83	83.3617	8.38178	19.02	52.2484	41.4206	53.8361	73.5549	32.3325	84.0393	44.5884	50.6066	98.0848	91.8551	25.1674	30.9968	98.3895	24.8734	74.4279	95.36	51.8399	34.7557	85.9435	59.9715	3.95771	36.6018	82.8493	11.1185	91.9489	29.0373	10.7347	71.5038	58.6817	65.3504	57.1861	66.3492
S8	42.8715	38.1487	18.7991	40.6835	74.6725	60.4501	57.8054	53.5966	40.376	84.8994	37.6117	52.2012	70.0453	6.04785	33.1874	91.7834	71.9534	65.3007	36.2375	73.1885	75.7663	63.3926	31.5443	40.3277	43.977	18.0124	97.1502	53.2189	57.9979	99.6305	66.4739	8.30905	47.3998	37.8864	67.1746	24.6815	39.7064	21.2226	12.7	10.4224	84.246	63.9103	27.0804	51.4864	40.6144	84.7316	17.3693	24.0277	83.3768
S9	2.57053	29.2091	91.1678	70.3413	54.2798	97.398	5.39049	33.4417	27.8272	55.8914	87.8542	34.8898	2.62867	71.6504	5.2269	25.1063	28.7087	33.0936	33.1024	18.3733	26.6283	71.4379	77.6719	11.3526	24.6505	50.7452	21.8531	96.445	60.0891	29.2175	41.2804	43.8161	89.9886	81.3508	50.8445	60.1163	33.7819	79.8785	2.95419	45.8338	56.5325	9.85223	7.06206	43.6309	91.772	59.7089	93.6788	46.5628	51.2728
S10	33.9972	65.8449	39.6757	44.7897	25.3079	5.9728	39.0291	94.8152	37.7494	11.8818	14.7064	1.02292	56.1835	13.9028	30.6089	1.84277	72.569	80.5974	85.4811	97.7018	11.1985	1.33084	16.2526	32.6483	6.01252	64.6225	53.9261	64.1563	97.7633	17.9361	61.44	83.4792	81.8576	70.884	51.3006	96.702	72.7503	23.9262	99.4262	12.5176	20.6873	80.5474	73.4008	82.3291	92.6602	50.107	41.9896	66.1822	20.5804
S1	78.4667	69.0605	56.6009	63.1449	60.9245	70.5437	92.7767	86.8222	83.0956	51.1241	73.6735	94.3583	69.001	91.8257	95.2999	68.6532	59.0469	84.7784	89.7143	53.8518	64.058	51.4728	97.0162	97.0775	66.5383	50.8096	50.8404	96.9731	64.1079	84.5785	98.3956	79.6268	85.1303	82.3421	98.8141	89.6457	87.339	87.3861	82.2332	86.6338	91.4908	67.7746	68.0165	78.5439	82.6695	81.2043	98.5269	90.5963	65.2494
S2	78.5268	82.8695	67.1651	98.7031	51.607	77.1292	78.067	61.1948	67.9192	98.1626	58.1673	73.3942	81.4998	74.9302	86.6947	99.5852	72.7822	92.3038	67.2045	70.7354	71.6985	76.9566	89.6243	55.7283	60.5143	80.819	75.2808	86.1671	83.0232	87.7502	62.4562	74.3235	74.9502	85.7498	54.1014	58.9543	74.7545	55.5644	90.3948	62.9498	99.9049	77.0058	52.5049	99.2094	77.0332	81.2053	54.2266	67.0206	76.3096
S3	60.6123	85.7474	93.5865	55.0965	65.8493	88.0904	95.6087	88.6343	59.2576	86.5327	54.3429	65.2683	89.5194	75.6385	52.4322	65.4927	57.4523	55.8405	59.5165	91.8192	64.3374	94.0387	58.211	74.6368	50.918	87.3214	85.3277	66.4331	51.2458	75.4686	60.992	88.3921	85.878	87.6202	68.0029	92.8297	81.9342	63.0279	64.1064	75.0447	83.8893	86.986	99.9685	69.9612	69.6137	50.7885	86.1742	69.6	64.1499
S4	60.1768	82.3591	96.6841	55.9088	78.2282	76.5644	53.5378	70.014	91.6924	88.3429	71.1371	94.4961	82.3073	63.6417	95.305	59.9051	54.18	94.2299	79.7794	73.4186	55.8038	62.1307	73.7056	91.9909	88.8628	54.0528	83.6525	82.1657	87.7873	64.59	58.9195	93.4701	93.9936	59.3177	58.7258	79.4904	83.933	61.5688	72.8279	99.7255	71.6722	93.7633	66.9139	84.7906	62.3602	58.2447	85.1765	80.8375	89.8055
S5	85.6107	90.7839	89.9115	96.347	52.1522	69.2215	51.7585	87.5556	99.9345	73.1248	53.4938	55.771	70.4539	92.407	57.6147	75.0584	54.6654	61.9493	50.1407	77.9462	57.4046	97.9966	53.6362	68.4011	53.079	78.0427	98.7851	97.4757	78.7951	67.3871	69.684	75.0238	81.768	53.5704	74.7513	62.7457	86.2454	79.9332	89.4084	74.511	82.7962	51.8556	64.8675	51.287	61.0185	96.4915	93.2289	52.0761	90.0533
S6	63.7401	72.0092	73.6815	94.6621	88.2315	86.2779	52.0414	51.5405	55.5561	70.8998	90.1674	52.6422	70.1611	92.5491	59.6622	91.2048	56.4933	84.0245	60.3014	58.7707	80.8435	59.179	55.6808	80.4627	68.724	89.9237	56.1229	93.9495	85.8487	90.5346	70.6028	89.0897	54.7895	81.3113	67.733	98.3044	65.9996	72.9673	53.4607	64.6835	91.7214	62.1649	55.0938	85.7131	76.6259	90.4102	55.862	80.6047	61.0495
S7	93.9861	93.6495	53.9228	61.6292	85.3492	50.4272	71.8588	87.8575	65.9005	67.2362	72.3095	98.2081	99.501	58.6469	96.3897	75.2935	80.7679	76.2249	72.5543	76.7173	99.3877	99.1822	81.6833	54.4552	54.9415	97.5298	56.3124	88.1166	53.0219	97.261	96.7608	99.6891	57.3226	84.2491	92.276	84.8549	56.6114	65.9205	76.1987	69.6812	85.6562	91.8425	64.2615	76.9423	87.1005	63.8335	96.8501	95.4608	85.1155
S8	75.8979	65.9998	55.9648	74.4946	87.1748	73.8334	93.3847	65.707	63.522	70.3171	99.1147	74.6751	86.9668	71.2523	98.2635	72.5017	95.2	86.9615	91.1941	59.4573	94.5672	76.5078	76.5071	63.9936	67.9329	66.9656	82.8518	67.7711	58.7739	99.555	91.8502	70.9538	86.48	60.8038	66.7943	63.1053	88.5385	51.2701	60.4406	65.594	75.0477	85.7725	82.4836	80.2434	94.2212	69.4104	93.4683	96.9602	89.5354
S9	87.0418	78.1914	81.2214	96.8512	73.4007	73.9904	67.5881	78.9027	97.0037	78.5896	63.7625	60.4766	66.6189	51.9305	63.4261	62.3553	50.5082	83.9227	65.1652	68.7635	89.046	53.9741	52.7669	99.613	51.8592	92.705	60.5008	54.681	78.7174	61.8582	88.1421	98.1007	89.7572	77.8813	72.8959	81.6077	51.5259	55.4741	53.4261	94.4995	88.5699	93.0269	82.0747	62.34	77.664	62.6538	94.052	81.7756	62.914
S10	70.6969	64.7879	97.7379	75.1194	92.7088	99.1551	97.6857	98.0638	55.7896	64.0007	82.1029	90.6658	72.0321	87.4463	81.2717	95.3276	74.7096	89.3636	81.1322	65.7311	57.3007	83.6052	89.8269	50.5669	96.6084	87.4797	67.3481	88.863	52.9957	54.0026	54.7318	99.6432	65.8341	93.8212	55.6998	68.5307	69.648	93.5163	99.4877	77.9924	68.3474	66.769	72.2541	95.0932	64.9758	60.0052	92.4681	97.6991	57.27
[truncated: 55 more columns]

## Sheet: neurosky
FOCUS
Time	1	2	3	4	5	6	7	8	9	10	Mean
S1	51.2	44.58	2.7	21.97	17.48	15.99	17.19	3.94	16.44	13.83	20.53
S2	52.35	1.07	26.77	7.65	0.36	24.02	25.1	20.94	24.65	10.62	19.35
S3	50.92	7.63	15.23	9.81	26.82	25.8	4.46	4.04	17.07	27.68	18.95
S4	9.37	5.33	28.78	4.29	4.17	2.98	18.12	26.81	12.2	24.2	13.62
S5	8.28	34.08	8.08	14.08	5.78	29.55	7.99	26.31	22.31	0.84	15.73
S6	63.37	44.17	6.5	10.2	6.97	17.15	27.69	11.15	17.91	0.2	20.53
S7	59.71	47.61	15.87	10.33	12.21	22.76	11.05	16.32	9.42	19.43	22.47
S8	16.46	8.01	0.57	3.26	15.64	26.2	26.53	19.43	20.31	25.67	16.21
S9	32.78	36.88	14.96	12.57	3.72	21.51	9.8	6.5	3.18	14.8	15.67
S10	38.17	11.82	23.94	12.7	12.13	11.67	17.56	8.62	15.6	17.64	16.99
Time	2	3	5	7	9	11	13	15	17	19	Mean
S1	19.85	17.43	7.63	26.74	22.67	19.8	36.49	1.09	6.62	1.56	15.99
S2	47.83	20.29	5.54	14.21	1.94	23.58	41	12.24	9.64	17.56	19.38
S3	9.17	35.58	5.52	16.85	28.35	26.16	74.79	11.55	20.73	4.11	23.28
S4	49.87	36.23	21.35	28.7	9.31	15.26	71.38	25.67	18.56	21.08	29.74
S5	6.65	25.84	20.12	23.18	21.13	26.09	9.95	19.32	19.81	18.99	19.11
S6	45.39	7.33	5.7	23.41	11.71	6.04	9.04	11.1	32.32	2.45	15.45
S7	31.3	30.41	9.79	14.21	8.93	23.01	11.04	23.28	19.4	25.77	19.72
S8	40.73	16.96	20.82	8.76	17.53	0.05	21.57	28.96	10.18	23.36	18.89
S9	42.67	26.04	6.89	15.17	13.01	0.74	61	6.64	2.54	8.94	18.36
S10	25.53	33.84	1.61	16.07	16.96	29.5	61.12	24.85	19.31	11.65	24.04
Time	5	10	15	20	25	30	35	40	45	50	Mean
S1	7.35	41.25	27.43	27.54	24.58	15.48	14.45	19.61	15.24	7.9	20.08
S2	49.14	12.3	21.43	17.28	17.06	9.41	20.51	14	8.71	5.04	17.49
S3	17.76	46.14	28.85	29.94	29.75	12.08	24.2	9.3	5.08	7.97	21.11
S4	31.24	23.89	17.68	23.6	21.8	19.76	0.57	24.24	12.32	16.23	19.13
S5	25.85	39.39	29.62	16.99	1.46	0.98	9.01	13.4	13.97	21.96	17.26
S6	21.22	21.77	26.56	1	12.93	10.01	12.01	12.67	13.45	7.52	13.91
S7	29.27	12.16	13.78	1.93	7.77	6.31	23.27	20.51	12.62	13.97	14.16
S8	25.66	29.92	27.59	12.23	27.21	9.74	4.2	22.14	26.61	14.39	19.97
S9	25.97	45.2	21.01	27.6	20.61	16.84	17.22	12.99	13.85	10.91	21.22
S10	40.93	45.68	9.6	24.35	12.06	22.2	13.94	16.46	25.12	20.16	23.05
ATPAZINIMO VIDURKIAI
	Mean
S1	79.73
S2	32.96
S3	64
S4	65.27
S5	25.83
S6	34.56
S7	68.36
S8	55.06
S9	64.87
S10	66.82
	55.746
MEDITATION
	1	2	3	4	5	6	7	8	9	10	Mean
S1	25.61	29.97	36.52	24.96	12.46	36.25	42.61	0.83	4.3	31.76	24.53
S2	8.47	46.46	5.84	13.12	18.12	24.27	22.09	12.27	44.8	32.72	22.82
S3	45.25	45.14	40.42	46.55	17.04	18.41	20.72	14.64	45.66	8.53	30.23
S4	1.06	10.4	7.59	45.29	23.58	13.23	13.19	21.55	6.4	24.11	16.64
S5	9.25	18.96	24.21	2.87	49.25	26.24	33.92	26.91	33.96	12.98	23.85
S6	23.29	39.38	21.49	15.72	45.41	35.66	24.28	6.75	5.89	26.87	24.47
S7	47.42	35.14	33.77	30.94	37.63	17.09	35.89	13.14	42.15	34.08	32.72
S8	5.82	48.06	39.36	39.1	34.36	19.2	43.57	10.61	0.75	7.4	24.82
S9	42.79	49.59	1.79	30.16	9.69	28.8	43.27	21.96	30.63	21.78	28.05
S10	2.67	49.49	24.82	21.36	9.91	23.71	13.61	14.06	41.81	46.35	24.78
	2	3	5	7	9	11	13	15	17	19	Mean
S1	23.39	19.89	3.22	47.07	44.15	38.42	45.96	14.01	0.52	19.13	25.58
S2	12.73	32.48	9.57	21.59	45.57	0.31	29.74	10.88	45.93	25.4	23.42
S3	21.62	25.86	43.51	2.65	35.41	35.01	2.35	0.47	10.49	8.06	18.54
S4	46.01	49.65	41.32	40.02	47.78	5.49	26.46	39.24	16.76	1.17	31.39
S5	28.12	43.85	0.72	16.99	17.51	6.78	21.77	25.35	29.2	38.56	22.88
S6	28.67	11.79	16.48	0.37	49.63	32.91	37.95	42.65	43.37	28.08	29.19
S7	5.22	12.35	46.22	13.62	3.41	10.54	38.69	9.47	40.21	39.95	21.97
S8	5.31	8.48	38.27	47.79	35.95	13.83	24.76	36.82	9.32	9.84	23.04
S9	38.74	3.34	10.7	4.62	24.54	46.89	30.78	33.46	32.32	12.21	23.76
S10	39.39	40.2	23.01	36.22	3.02	26.54	45.78	29.56	11.02	28.49	28.32
	5	10	15	20	25	30	35	40	45	50	Mean
S1	46.89	15.76	31.82	46.01	11.24	41.94	38.91	11.56	47.94	18.17	31.03
S2	28.14	31.41	9.67	21.19	26.75	29.79	33.84	16.41	49.5	0.34	24.7
S3	4.5	38.11	29.18	35.92	42.78	13.33	29.38	39.03	49.79	16.9	29.89
S4	7.95	39.73	14.53	44.89	39.45	16.45	39.42	13.24	4.31	31.85	25.18
S5	22.17	2.65	34.04	42.29	12.79	2.88	43.26	22.53	32.53	34.22	24.94
S6	46.4	38.51	25.47	4.21	47.2	14.91	48.56	11.84	26.26	35.93	29.93
S7	45.15	43.04	23.14	10.07	17.55	0.35	3.43	31.64	12.83	46.2	23.34
S8	38.3	26	42.08	5.58	43.26	17.52	9.44	12.52	14.38	12.19	22.13
S9	11.89	33.88	36.78	42.69	12.89	38.72	17.6	13.05	38.38	28.81	27.47
S10	8.48	5.54	32.11	49.53	17.47	21.38	40.32	7.82	14.31	12.38	20.93
	Mean
S1	46.17
S2	54.41
S3	60.16
S4	53.59
S5	72.83
S6	47.85
S7	87.02
S8	77.34
S9	60.99
S10	53.06
	61.342

## Sheet: neurosky-all
																															Mean		Diff
51.2	44.58	2.7	21.97	17.48	15.99	17.19	3.94	16.44	13.83	19.85	17.43	7.63	26.74	22.67	19.8	36.49	1.09	6.62	1.56	7.35	41.25	27.43	27.54	24.58	15.48	14.45	19.61	15.24	7.9		18.8677	27.0423	8.17467
52.35	1.07	26.77	7.65	0.36	24.02	25.1	20.94	24.65	10.62	47.83	20.29	5.54	14.21	1.94	23.58	41	12.24	9.64	17.56	49.14	12.3	21.43	17.28	17.06	9.41	20.51	14	8.71	5.04		18.7413	23.6467	4.90533
50.92	7.63	15.23	9.81	26.82	25.8	4.46	4.04	17.07	27.68	9.17	35.58	5.52	16.85	28.35	26.16	74.79	11.55	20.73	4.11	17.76	46.14	28.85	29.94	29.75	12.08	24.2	9.3	5.08	7.97		21.1113	26.2237	5.11233
9.37	5.33	28.78	4.29	4.17	2.98	18.12	26.81	12.2	24.2	49.87	36.23	21.35	28.7	9.31	15.26	71.38	25.67	18.56	21.08	31.24	23.89	17.68	23.6	21.8	19.76	0.57	24.24	12.32	16.23		20.833	24.404	3.571
8.28	34.08	8.08	14.08	5.78	29.55	7.99	26.31	22.31	0.84	6.65	25.84	20.12	23.18	21.13	26.09	9.95	19.32	19.81	18.99	25.85	39.39	29.62	16.99	1.46	0.98	9.01	13.4	13.97	21.96		17.367	23.892	6.525
63.37	44.17	6.5	10.2	6.97	17.15	27.69	11.15	17.91	0.2	45.39	7.33	5.7	23.41	11.71	6.04	9.04	11.1	32.32	2.45	21.22	21.77	26.56	1	12.93	10.01	12.01	12.67	13.45	7.52		16.6313	27.8643	11.233
59.71	47.61	15.87	10.33	12.21	22.76	11.05	16.32	9.42	19.43	31.3	30.41	9.79	14.21	8.93	23.01	11.04	23.28	19.4	25.77	29.27	12.16	13.78	1.93	7.77	6.31	23.27	20.51	12.62	13.97		18.7813	26.011	7.22967
16.46	8.01	0.57	3.26	15.64	26.2	26.53	19.43	20.31	25.67	40.73	16.96	20.82	8.76	17.53	0.05	21.57	28.96	10.18	23.36	25.66	29.92	27.59	12.23	27.21	9.74	4.2	22.14	26.61	14.39		18.3563	23.329	4.97267
32.78	36.88	14.96	12.57	3.72	21.51	9.8	6.5	3.18	14.8	42.67	26.04	6.89	15.17	13.01	0.74	61	6.64	2.54	8.94	25.97	45.2	21.01	27.6	20.61	16.84	17.22	12.99	13.85	10.91		18.418	26.425	8.007
38.17	11.82	23.94	12.7	12.13	11.67	17.56	8.62	15.6	17.64	25.53	33.84	1.61	16.07	16.96	29.5	61.12	24.85	19.31	11.65	40.93	45.68	9.6	24.35	12.06	22.2	13.94	16.46	25.12	20.16		21.3597	24.6787	3.319
																																Mean	6.30497
																															Mean
25.61	29.97	36.52	24.96	12.46	36.25	42.61	0.83	4.3	31.76	23.39	19.89	3.22	47.07	44.15	38.42	45.96	14.01	0.52	19.13	46.89	15.76	31.82	46.01	11.24	41.94	38.91	11.56	47.94	18.17		27.0423
8.47	46.46	5.84	13.12	18.12	24.27	22.09	12.27	44.8	32.72	12.73	32.48	9.57	21.59	45.57	0.31	29.74	10.88	45.93	25.4	28.14	31.41	9.67	21.19	26.75	29.79	33.84	16.41	49.5	0.34		23.6467
45.25	45.14	40.42	46.55	17.04	18.41	20.72	14.64	45.66	8.53	21.62	25.86	43.51	2.65	35.41	35.01	2.35	0.47	10.49	8.06	4.5	38.11	29.18	35.92	42.78	13.33	29.38	39.03	49.79	16.9		26.2237
1.06	10.4	7.59	45.29	23.58	13.23	13.19	21.55	6.4	24.11	46.01	49.65	41.32	40.02	47.78	5.49	26.46	39.24	16.76	1.17	7.95	39.73	14.53	44.89	39.45	16.45	39.42	13.24	4.31	31.85		24.404
9.25	18.96	24.21	2.87	49.25	26.24	33.92	26.91	33.96	12.98	28.12	43.85	0.72	16.99	17.51	6.78	21.77	25.35	29.2	38.56	22.17	2.65	34.04	42.29	12.79	2.88	43.26	22.53	32.53	34.22		23.892
23.29	39.38	21.49	15.72	45.41	35.66	24.28	6.75	5.89	26.87	28.67	11.79	16.48	0.37	49.63	32.91	37.95	42.65	43.37	28.08	46.4	38.51	25.47	4.21	47.2	14.91	48.56	11.84	26.26	35.93		27.8643
47.42	35.14	33.77	30.94	37.63	17.09	35.89	13.14	42.15	34.08	5.22	12.35	46.22	13.62	3.41	10.54	38.69	9.47	40.21	39.95	45.15	43.04	23.14	10.07	17.55	0.35	3.43	31.64	12.83	46.2		26.011
5.82	48.06	39.36	39.1	34.36	19.2	43.57	10.61	0.75	7.4	5.31	8.48	38.27	47.79	35.95	13.83	24.76	36.82	9.32	9.84	38.3	26	42.08	5.58	43.26	17.52	9.44	12.52	14.38	12.19		23.329
42.79	49.59	1.79	30.16	9.69	28.8	43.27	21.96	30.63	21.78	38.74	3.34	10.7	4.62	24.54	46.89	30.78	33.46	32.32	12.21	11.89	33.88	36.78	42.69	12.89	38.72	17.6	13.05	38.38	28.81		26.425
2.67	49.49	24.82	21.36	9.91	23.71	13.61	14.06	41.81	46.35	39.39	40.2	23.01	36.22	3.02	26.54	45.78	29.56	11.02	28.49	8.48	5.54	32.11	49.53	17.47	21.38	40.32	7.82	14.31	12.38		24.6787
																														Grand mean	22.1992

## Sheet: emotiv
FOCUS
	1	2	3	4	5	6	7	8	9	10	Mean
S1	58.28	58.34	68.98	58.85	73.26	56.8	60.84	78.63	62.49	71.2	64.77
S2	78.28	78.35	73.3	64.76	64.01	65.63	54.76	66.38	58.41	72.18	67.6
S3	74.83	67.17	51.43	58.09	70.9	62.53	54.31	69.13	62.32	59.85	63.06
S4	65.81	76.33	69.62	72.29	64.68	78.7	76.44	70.15	65.21	77.68	71.69
S5	52.03	56.57	53.33	60.24	53.09	75.94	66.68	58.53	66.7	77.19	62.03
S6	76.98	77.37	50.08	59.41	57.72	50.49	62.29	54.42	63.56	72.37	62.47
S7	70.3	79.16	76.19	50.87	63.2	71.42	64.25	71.15	50.48	77.57	67.46
S8	72.25	62.78	68.48	60.12	58.57	77.36	61.73	63.86	76.01	52.38	65.35
S9	71.26	75.61	79.74	73.59	76.95	66.18	70.01	78.17	66.9	64.17	72.26
S10	54.29	53.64	62.48	57.44	52.47	78.36	53.08	51.05	54.26	74.9	59.2
	2	3	5	7	9	11	13	15	17	19	Mean
S1	57.04	58.67	78.08	53.07	70.99	50.4	58.3	67.11	59.95	79.29	63.29
S2	63.29	67.14	61.04	56.01	60.95	51.81	76.4	79.35	61.85	57.34	63.52
S3	55.63	61.48	57.06	76.36	54.36	79.19	62.25	62.85	53.04	62.27	62.45
S4	60.15	51.41	62.04	68.78	74.15	71.31	58.99	78.8	61.59	60.22	64.74
S5	59.54	59.66	71.67	64.48	67.57	75.78	74.09	78.66	54.49	78.54	68.45
S6	75.74	52.99	60.69	71.62	77.54	70.2	50	73.37	71.79	58.86	66.28
S7	76.13	79.58	75.12	73.11	56.04	61.55	62.39	69.91	53.1	55.21	66.21
S8	50.73	75.78	73.03	56.87	55.63	60.83	57.25	67.12	70.42	67.82	63.55
S9	75.08	64.46	66.05	52.25	73.12	54.64	75.52	74.23	62.56	64.49	66.24
S10	52.09	72.57	76.9	50.07	58.45	75.39	50.27	64.06	55.92	63.75	61.95
	5	10	15	20	25	30	35	40	45	50	Mean
S1	63.2	70.87	79.67	73.04	51.64	58.5	67.62	60.16	78.8	61.02	66.45
S2	66.9	55.72	71.57	70.92	58.52	57.88	50.81	75.58	57.11	66.18	63.12
S3	77.42	59.19	75.32	54.34	58.62	74.19	68.05	65.81	75.69	63.53	67.21
S4	70.82	50.25	69.25	68.6	56.91	71.38	61.45	67.72	66.19	57.7	64.03
S5	68.55	66.15	58.68	79.79	53.82	55.52	53.52	66.05	74.78	66.79	64.36
S6	72.57	63.47	60.84	67.95	66.56	60.7	71.2	58.77	59.41	55	63.65
S7	74.17	76.29	74.94	57.22	52.19	79.06	76.08	78.23	72.5	65.39	70.61
S8	70.68	61.69	73.89	58.79	63.57	58.75	56.19	66.83	65.94	63.66	64
S9	71.3	67.76	58.12	54.63	71.1	73.7	72.35	52.5	67.72	61.34	65.05
S10	54.27	55.5	78.86	54.86	74.27	72.32	59.41	61.11	66.57	72.91	65.01
	Mean
S1	57.65
S2	48.66
S3	84.2
S4	59.74
S5	82.25
S6	92.2
S7	80.11
S8	65.15
S9	45.9
S10	60.46	67.632
MEDITATION
	1	2	3	4	5	6	7	8	9	10	Mean
S1	25.02	30.88	77.22	53.39	56.85	55.48	50.86	44.36	61.33	77.7	53.31
S2	36.35	68.94	25.89	76.26	64.48	76.28	86.87	65.71	78.9	43.09	62.28
S3	58.02	49.78	88.61	71.95	62.32	21.24	48.48	33.13	40.19	88.73	56.25
S4	46.82	77.67	63.17	56.73	64.25	40.97	36.86	82.04	75.82	25.72	57
S5	42.67	51.73	57.67	27.64	26.48	88.2	51.41	37.93	63.18	43.37	49.03
S6	45.24	75.27	33.66	67.07	25.17	80.12	89.3	69.91	76.78	50.18	61.27
S7	61.02	59.08	89.35	36.39	60.69	54.54	43.15	69.77	21.65	73.74	56.94
S8	38.83	56.01	63.78	31.03	71.08	43.41	52.04	49.05	56.21	73.33	53.48
S9	61.98	78.55	24.23	28.6	23.97	86.9	64.96	77.83	86.44	31.7	56.52
S10	56.87	37.71	46.15	31.14	69.49	54.46	33.92	66.87	83.03	30.25	50.99
	2	3	5	7	9	11	13	15	17	19	Mean
S1	65.53	78.57	87.5	31.85	68.31	35.83	55.08	21.58	72.03	85.29	60.16
S2	30.58	45.67	85.48	39.93	23.55	88.62	38.8	68.01	76.27	80.12	57.7
S3	86.27	77.08	46.78	85.82	24.26	39.01	62.36	89.57	63.13	82.55	65.68
S4	34.45	56.05	66.82	63.04	55.99	55.02	89.85	76.93	48.56	81.74	62.84
S5	59.46	77.85	74.71	80.97	47.95	78.13	33.07	89.86	75.76	46.46	66.42
S6	37.29	72.32	79.06	67.86	28.96	79.7	34.72	60.56	56.53	36.68	55.37
S7	26.06	83.24	33.98	89.84	53.89	38.04	28.84	58.54	88.08	73.65	57.42
S8	69.66	42.39	20.89	41.7	31.55	49.35	22.64	61.79	44.16	40.24	42.44
S9	33.32	22.1	26.58	67.72	80.56	53.89	27.39	60.6	51.1	86.6	50.99
S10	26.54	51.85	50.33	35.27	75.1	35.54	32.8	60.04	86.65	20.21	47.43
	5	10	15	20	25	30	35	40	45	50	Mean
S1	70.51	41.33	28.16	88.4	77.47	59.13	21.11	86.97	58.71	76.72	60.85
S2	22.6	79.48	85.28	66.54	22.68	39.03	53.29	81.69	85.12	65.59	60.13
S3	67.4	81.05	47.99	26.51	71.51	50.47	31	71.43	23.16	78.76	54.93
S4	73.62	83.71	87.27	27.18	76.41	21.02	69.57	24.64	65.81	89.37	61.86
S5	57.63	24.54	88.28	52.85	58.67	34.87	59.46	75.37	30.79	43.96	52.64
S6	49.05	26.52	38.19	62.21	87.22	57.54	64.94	78.82	61.66	54.63	58.08
S7	30.52	36.15	47.04	24.52	23.72	32.07	46.02	76.05	70.42	60.66	44.72
S8	72.74	70.43	29.06	66.21	27.05	68.08	81.85	45.94	84.89	63.75	61
S9	35.67	29.53	43.83	57.13	54.68	38.95	61.56	89.17	48.24	78.48	53.72
S10	43.32	37.35	76	43.72	46.35	25.77	22.84	84.6	60.87	21.8	46.26
	Mean
S1	68.86
S2	90.21
S3	66.48
S4	85.18
S5	83.62
S6	83.84
S7	78.72
S8	56.24
S9	68.08
S10	67.78
	74.901

## Sheet: emotiv-all
																															Mean		Diff
58.28	58.34	68.98	58.85	73.26	56.8	60.84	78.63	62.49	71.2	57.04	58.67	78.08	53.07	70.99	50.4	58.3	67.11	59.95	79.29	63.2	70.87	79.67	73.04	51.64	58.5	67.62	60.16	78.8	61.02		64.8363	58.1057	6.73067
78.28	78.35	73.3	64.76	64.01	65.63	54.76	66.38	58.41	72.18	63.29	67.14	61.04	56.01	60.95	51.81	76.4	79.35	61.85	57.34	66.9	55.72	71.57	70.92	58.52	57.88	50.81	75.58	57.11	66.18		64.7477	60.0367	4.711
74.83	67.17	51.43	58.09	70.9	62.53	54.31	69.13	62.32	59.85	55.63	61.48	57.06	76.36	54.36	79.19	62.25	62.85	53.04	62.27	77.42	59.19	75.32	54.34	58.62	74.19	68.05	65.81	75.69	63.53		64.2403	58.952	5.28833
65.81	76.33	69.62	72.29	64.68	78.7	76.44	70.15	65.21	77.68	60.15	51.41	62.04	68.78	74.15	71.31	58.99	78.8	61.59	60.22	70.82	50.25	69.25	68.6	56.91	71.38	61.45	67.72	66.19	57.7		66.8207	60.57	6.25067
52.03	56.57	53.33	60.24	53.09	75.94	66.68	58.53	66.7	77.19	59.54	59.66	71.67	64.48	67.57	75.78	74.09	78.66	54.49	78.54	68.55	66.15	58.68	79.79	53.82	55.52	53.52	66.05	74.78	66.79		64.9477	56.0307	8.917
76.98	77.37	50.08	59.41	57.72	50.49	62.29	54.42	63.56	72.37	75.74	52.99	60.69	71.62	77.54	70.2	50	73.37	71.79	58.86	72.57	63.47	60.84	67.95	66.56	60.7	71.2	58.77	59.41	55		64.132	58.2387	5.89333
70.3	79.16	76.19	50.87	63.2	71.42	64.25	71.15	50.48	77.57	76.13	79.58	75.12	73.11	56.04	61.55	62.39	69.91	53.1	55.21	74.17	76.29	74.94	57.22	52.19	79.06	76.08	78.23	72.5	65.39		68.0933	53.0237	15.0697
72.25	62.78	68.48	60.12	58.57	77.36	61.73	63.86	76.01	52.38	50.73	75.78	73.03	56.87	55.63	60.83	57.25	67.12	70.42	67.82	70.68	61.69	73.89	58.79	63.57	58.75	56.19	66.83	65.94	63.66		64.3003	52.3047	11.9957
71.26	75.61	79.74	73.59	76.95	66.18	70.01	78.17	66.9	64.17	75.08	64.46	66.05	52.25	73.12	54.64	75.52	74.23	62.56	64.49	71.3	67.76	58.12	54.63	71.1	73.7	72.35	52.5	67.72	61.34		67.85	53.742	14.108
54.29	53.64	62.48	57.44	52.47	78.36	53.08	51.05	54.26	74.9	52.09	72.57	76.9	50.07	58.45	75.39	50.27	64.06	55.92	63.75	54.27	55.5	78.86	54.86	74.27	72.32	59.41	61.11	66.57	72.91		62.0507	48.228	13.8227
																																Mean	9.2787
																															Mean
25.02	30.88	77.22	53.39	56.85	55.48	50.86	44.36	61.33	77.7	65.53	78.57	87.5	31.85	68.31	35.83	55.08	21.58	72.03	85.29	70.51	41.33	28.16	88.4	77.47	59.13	21.11	86.97	58.71	76.72		58.1057
36.35	68.94	25.89	76.26	64.48	76.28	86.87	65.71	78.9	43.09	30.58	45.67	85.48	39.93	23.55	88.62	38.8	68.01	76.27	80.12	22.6	79.48	85.28	66.54	22.68	39.03	53.29	81.69	85.12	65.59		60.0367
58.02	49.78	88.61	71.95	62.32	21.24	48.48	33.13	40.19	88.73	86.27	77.08	46.78	85.82	24.26	39.01	62.36	89.57	63.13	82.55	67.4	81.05	47.99	26.51	71.51	50.47	31	71.43	23.16	78.76		58.952
46.82	77.67	63.17	56.73	64.25	40.97	36.86	82.04	75.82	25.72	34.45	56.05	66.82	63.04	55.99	55.02	89.85	76.93	48.56	81.74	73.62	83.71	87.27	27.18	76.41	21.02	69.57	24.64	65.81	89.37		60.57
42.67	51.73	57.67	27.64	26.48	88.2	51.41	37.93	63.18	43.37	59.46	77.85	74.71	80.97	47.95	78.13	33.07	89.86	75.76	46.46	57.63	24.54	88.28	52.85	58.67	34.87	59.46	75.37	30.79	43.96		56.0307
45.24	75.27	33.66	67.07	25.17	80.12	89.3	69.91	76.78	50.18	37.29	72.32	79.06	67.86	28.96	79.7	34.72	60.56	56.53	36.68	49.05	26.52	38.19	62.21	87.22	57.54	64.94	78.82	61.66	54.63		58.2387
61.02	59.08	89.35	36.39	60.69	54.54	43.15	69.77	21.65	73.74	26.06	83.24	33.98	89.84	53.89	38.04	28.84	58.54	88.08	73.65	30.52	36.15	47.04	24.52	23.72	32.07	46.02	76.05	70.42	60.66		53.0237
38.83	56.01	63.78	31.03	71.08	43.41	52.04	49.05	56.21	73.33	69.66	42.39	20.89	41.7	31.55	49.35	22.64	61.79	44.16	40.24	72.74	70.43	29.06	66.21	27.05	68.08	81.85	45.94	84.89	63.75		52.3047
61.98	78.55	24.23	28.6	23.97	86.9	64.96	77.83	86.44	31.7	33.32	22.1	26.58	67.72	80.56	53.89	27.39	60.6	51.1	86.6	35.67	29.53	43.83	57.13	54.68	38.95	61.56	89.17	48.24	78.48		53.742
56.87	37.71	46.15	31.14	69.49	54.46	33.92	66.87	83.03	30.25	26.54	51.85	50.33	35.27	75.1	35.54	32.8	60.04	86.65	20.21	43.32	37.35	76	43.72	46.35	25.77	22.84	84.6	60.87	21.8		48.228
																														Grand mean	60.5626
